# Supplementary material for: Circulating expression of Hsa_circRNA_102893 contributes to early gestational diabetes mellitus detection
Source: PubMed Central journal article supplement (PMC7642424; doi:10.1038/s41598-020-76013-5), 2020-11-04
Supplement: 41598_2020_76013_MOESM1_ESM.pdf [file 41598_2020_76013_MOESM1_ESM.pdf]

**Circulating Expression of Hsa\_circRNA\_102893 Contributes to Early  
Gestational Diabetes Mellitus Detection**

**Running Title:** Hsa\_circRNA\_102893 Prediction of GDM

Hongling Yang<sup>1,†</sup>, Weitao Ye<sup>2,†</sup>, Ruihua Chen<sup>3,†</sup>, Fangling Zeng<sup>1,†</sup>, Yan Long<sup>1</sup>, Xiaoyan Zhang<sup>1</sup>, Jun Ma<sup>2</sup>, Qiangsheng Gan<sup>2</sup>, Rehemayi·rehemutula<sup>2</sup>, Chunyan Zhu<sup>2</sup> \*

<sup>1</sup> Department of Laboratory, Guangzhou Women and Children's Medical Centre, Guangzhou Medical University, Guangzhou, China

<sup>2</sup> Department of preventive medicine, School of Public Health, Guangzhou Medical University, Guangzhou, 511436, China

<sup>3</sup> Department of health education, Health Education Center of Panyu, Guangzhou, China

\* **Correspondence to:** Chunyan Zhu

Xinzao, Panyu District, Guangzhou, 511436, P.R. China

Tel: +86-20-37103520, Fax: +86-20-37103520

E-mail: [zchyan@163.com](mailto:zchyan@163.com)

† The author should be regarded as joint First Authors.

Table S1 Sequence of the internal reference and the paired primers of qPCR

| circRNA            | Gene symbol | Bidirectional primer sequence                                      | Annealing temperature (°C) | Product length (bp) |
|--------------------|-------------|--------------------------------------------------------------------|----------------------------|---------------------|
| β-actin (H)        |             | F:5' GTGGCCGAGGACTTTGATTG 3'<br>R :5' CCTGTAACAACGCATCTCATATT 3'   | 60                         | 73                  |
| hsa_circRNA_103740 | SCLT1       | F:5'ACAACCTCCGAAAAAACTTAGGTTG 3'<br>R :5' CTGTGCCCAAGGGAAAGG 3'    | 60                         | 83                  |
| hsa_circRNA_102893 | CLK1        | F:5' GATGACGAACATCACAGTACAT 3'<br>R:5'TCTGTGTGAGTCAACTTATTACTGT 3' | 60                         | 95                  |
| hsa_circRNA_101232 | ZDHHC20     | F:5' ACCTATCTATACCACATCAGCT 3'<br>R :5' CAAACATAACAAAGAACAGATG 3'  | 60                         | 107                 |
| hsa_circRNA_100380 | DCAF6       | F:5' ACAGATTGTATCCTGCTCTG 3'<br>R :5' TTAATCTTTGGATAAATTCTCTT 3'   | 60                         | 139                 |
| hsa_circRNA_102736 | XPO1        | F:5' ATACGAAATACTATGGACTACAA 3'<br>R :5' TCTTGAGCCATTCTTTGC 3'     | 60                         | 98                  |

Table S2 Sociodemographic characteristics of the mothers and newborns with gestational diabetes mellitus (GDM) or not (controls) in the discovery set, training set and test set.

|                                                    |          | Discover y set |                    | Taining set     |                     | Test set        |                     |
|----------------------------------------------------|----------|----------------|--------------------|-----------------|---------------------|-----------------|---------------------|
|                                                    |          | GDM<br>(n = 6) | Control<br>(n = 6) | GDM<br>(n = 12) | Control<br>(n = 12) | GDM<br>(n = 18) | Control<br>(n = 18) |
| Maternal age (years) #                             | Mean± SD | 31.3±3.1       | 32.2±4.1           | 31.8± 3.3       | 32.3± 3.5           | 29.6±3.1        | 29.6±3.3            |
|                                                    | Min-max  | 26-35          | 27-38              | 26-38           | 27-38               | 24-38           | 24-38               |
| Gravidity (times) #                                | 1        | 2(33.3)        | 2(33.3)            | 3( 25.0)        | 4(33.3)             | 17( 53.1)       | 17( 53.1)           |
|                                                    | ≥ 2      | 4(66.7)        | 4(66.7)            | 9( 75.0)        | 8( 66.7)            | 15( 46.9)       | 15( 46.9)           |
| Parity (times) #                                   | 0        | 4(66.7)        | 6(100.0)           | 5( 41.7)        | 5( 41.7)            | 23( 71.9)       | 25( 78.1)           |
|                                                    | ≥ 1      | 2(33.3)        | 0                  | 7( 58.3)        | 7( 58.3)            | 9( 28.1)        | 7( 21.9)            |
| Pre-pregnancy BMI<br>(weight/height <sup>2</sup> ) | < 24     | 5(83.3)        | 5(83.3)            | 11( 91.7)       | 8( 66.7)            | 30( 93.7)       | 27( 84.4)           |
|                                                    | ≥ 24     | 1(16.7)        | 1(16.7)            | 1( 8.3)         | 4( 33.3)            | 2( 6.3)         | 5( 15.6)            |
| Cesarean delivery                                  | No       | 2(33.3)        | 4(66.7)            | 6(50.0)         | 6(50.0)             | 20( 62.5)       | 26( 81.3)           |
|                                                    | Yes      | 4(66.7)        | 2(33.3)            | 6(50.0)         | 6(50.0)             | 12( 37.5)       | 6( 18.7)            |
| Newborn birth weight(g)                            | Mean± SD | 3086±249       | 3215±245           | 3032.5±642.8    | 3212.5± 473.7       | 3177.8±492.1    | 3210.9±388.6        |
| Newborn sex                                        | Male     | 2(33.3)        | 5(83.3)            | 7(58.3)         | 5(41.7)             | 17( 53.1)       | 15( 46.9)           |
|                                                    | female   | 4(66.7)        | 1(16.7)            | 5(41.7)         | 7(58.3)             | 15( 46.9)       | 17( 53.1)           |
| Intensive neonatal care                            | No       | 6(100)         | 6(100)             | 12(100)         | 12(100)             | 31( 96.9)       | 32(100)             |
|                                                    | Yes      | 0              | 0                  | 0               | 0                   | 1(3.1)          | 0                   |
| Premature delivery<br>(<37 weeks)                  | No       | 0              | 0                  | 11( 91.4)       | 12(100)             | 29( 90.6)       | 32(100)             |
|                                                    | Yes      | 6(100)         | 6(100)             | 1( 8.3)         | 0                   | 3( 9.4)         | 0                   |
| BS0                                                | Mean± SD | 4.5±0.5        | 4.4±0.4            | 4.4±0.5         | 4.4±0.4             | 4.6±0.5*        | 4.3±0.4             |
| BS60                                               | Mean± SD | 9.6±2.0*       | 7.1±1.4            | 9.1±1.8**       | 7.1±1.3             | 9.4±1.9**       | 7.2±1.3             |
| BS120                                              | Mean± SD | 8.6±1.3**      | 6.3±1.1            | 8.8±1.4**       | 6.5±0.9             | 8.5±1.6**       | 6.3±0.9             |

# Maternal age, gravidity, parity and gestational weeks were determined at the time of recruitment. Control subjects were matched against subjects with GDM.

\* P<0.05, \*\*P<0.01

Table S3 Association between maternal sociodemographic characteristics, clinical parameters and GDM of multivariate logistic regression analysis

| Variable                                       | $\beta$ | S.E. | <i>P</i> | RR*  | 95% CI (RR) |
|------------------------------------------------|---------|------|----------|------|-------------|
| Maternal age (years)                           | 0.73    | 0.24 | <0.01    | 2.08 | 1.31-3.31   |
| Prepregnancy BMI (weight/height <sup>2</sup> ) | 0.13    | 0.04 | <0.01    | 1.13 | 1.05-1.23   |
| APTT*                                          | -0.08   | 0.06 | 0.14     | 0.92 | 0.82-1.03   |
| FIB*                                           | -0.02   | 0.19 | 0.91     | 0.98 | 0.67-1.43   |
| MONO*                                          | 1.84    | 0.96 | 0.05     | 6.31 | 0.97-41.18  |
| NEUT*                                          | 0.09    | 0.08 | 0.23     | 1.09 | 0.94-1.27   |
| HCT*                                           | 0.08    | 0.06 | 0.14     | 1.09 | 0.97-1.22   |
| Constant                                       | -5.38   | 0.86 | <0.01    | 0.01 |             |

\* Data for first pregnancy or second trimester

APTT: Activated Partial Thromboplastin Time, FIB: Fibrinogen, MONO: Monocyte, NEUT: Neutrophils, HCT: Hematocrit, RR: relative risk.

Table S4 The relationship of hsa\_circRNA\_102893 expression levels in plasma with clinical factors and pregnancy outcomes of pregnant women with GDM

| Variables                                         | GDM                     |          | Control                 |          |
|---------------------------------------------------|-------------------------|----------|-------------------------|----------|
|                                                   | Correlation Coefficient | <i>P</i> | Correlation Coefficient | <i>P</i> |
| Maternal age (years)                              | 0.426                   | 0.1674   | -0.592                  | 0.0425   |
| Prepregnancy BMI<br>(weight/height <sup>2</sup> ) | 0.025                   | 0.8951   | 0.269                   | 0.3966   |
| Gestational weeks (weeks)                         | 0.068                   | 0.7100   | -0.243                  | 0.1811   |
| Neonatal weight (g)                               | 0.109                   | 0.5513   | -0.259                  | 0.1526   |
| BS0                                               | 0.548                   | 0.0650   | 0.136                   | 0.5353   |
| BS60                                              | 0.203                   | 0.2821   | -0.223                  | 0.3061   |
| BS120                                             | 0.054                   | 0.7768   | -0.248                  | 0.2539   |

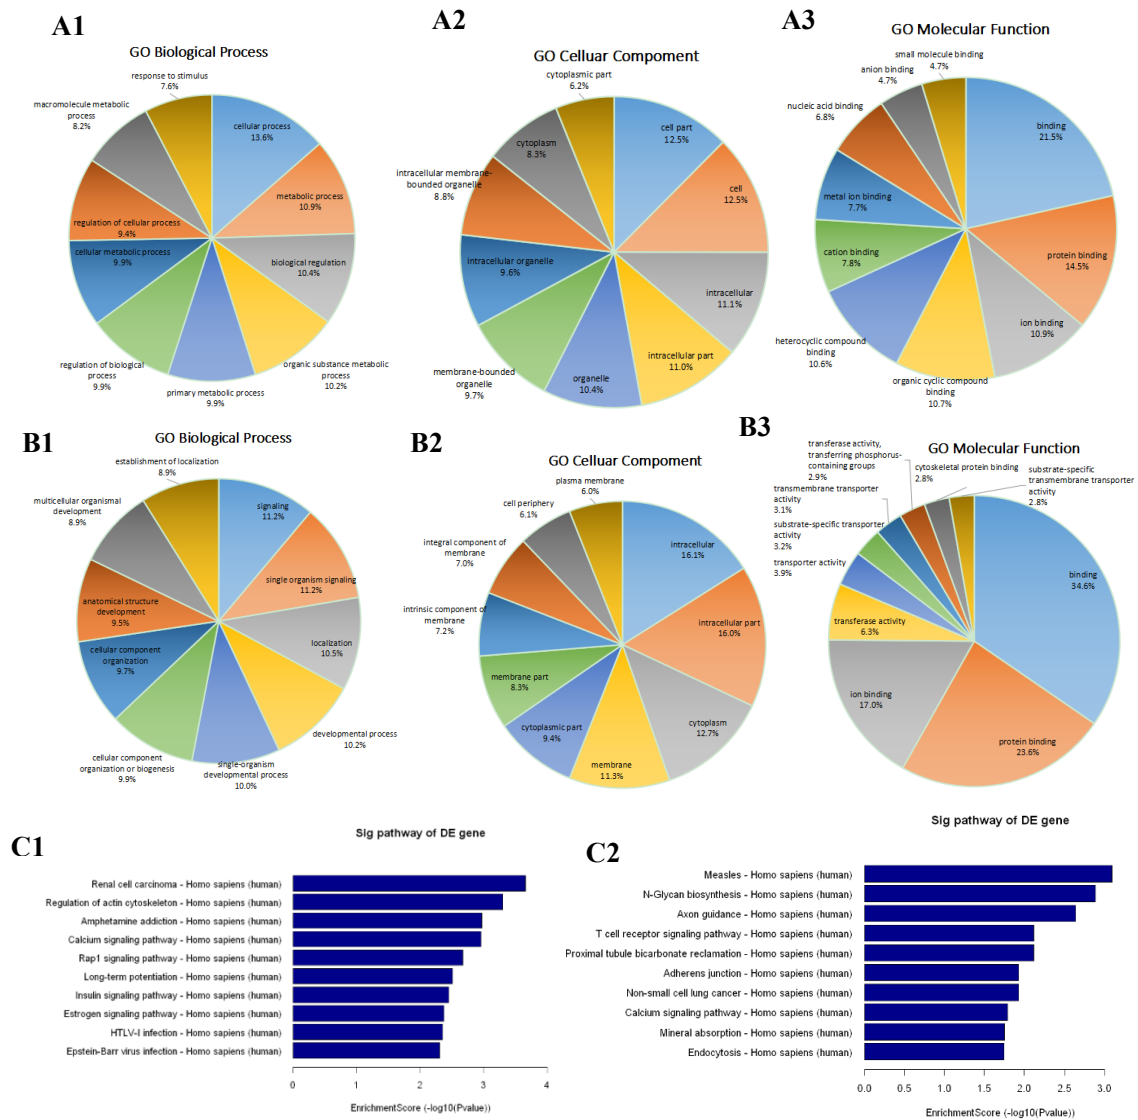

**Fig S1. The bioinformatic analysis of the differentially expressed profiles.** The pie charts show the top ten counts of the significant enrichment terms in differentially expressed up-regulated circRNAs (A1-A3) and down-regulated circRNAs (B1-B3). The bar plots show the top ten Enrichment score ( $-\log_{10}(P\text{-value})$ ) value of the significant enrichment pathway in differentially expressed up-regulated circRNAs (C1) and down-regulated circRNAs (C2).

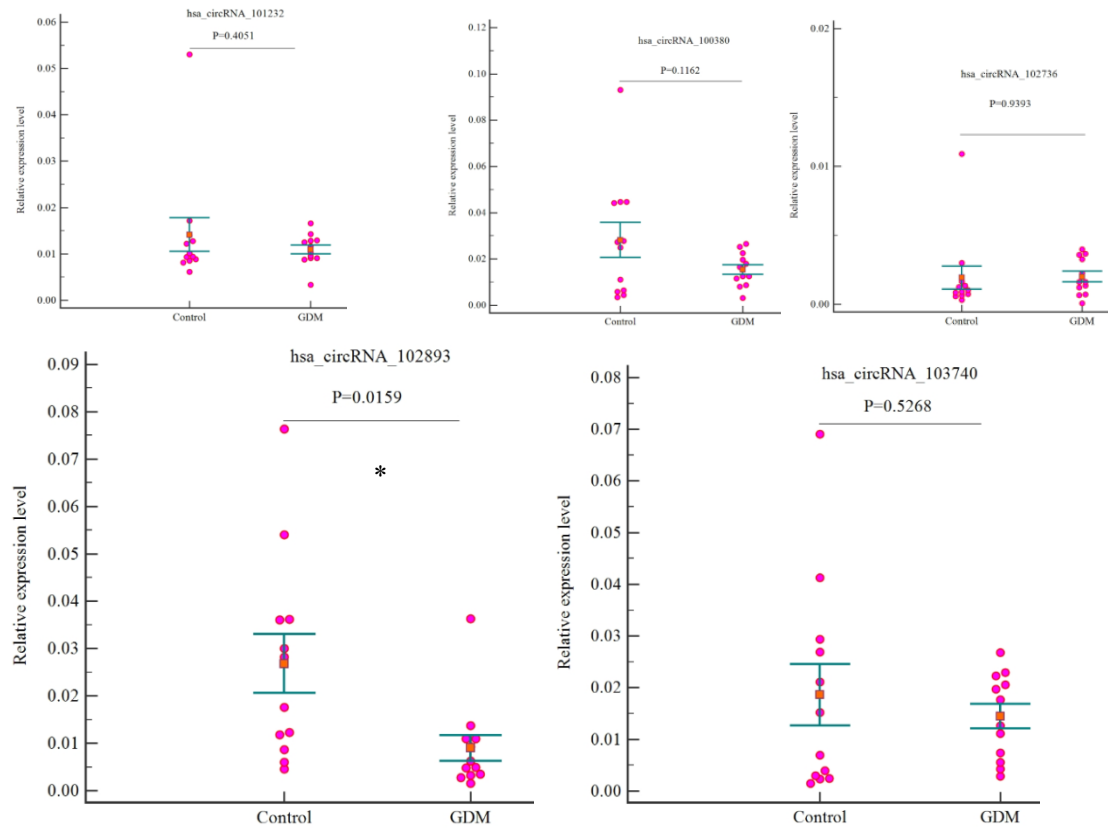

**Fig S2. Validation of most relevant circRNAs by qRT-PCR in the plasma of pregnant women with GDM in comparison with healthy pregnant women (control).** Scatter plots show relative expression levels of circulating hsa\_circRNA\_100380, hsa\_circRNA\_101232, hsa\_circRNA\_102736, hsa\_circRNA\_102893 and hsa\_circRNA\_103740 with their corresponding *P* values (Paired t-test), the orange boxes and the horizontal bars represent the mean and the standard error, respectively. ‘\*’ denotes  $P < 0.05$ .

A

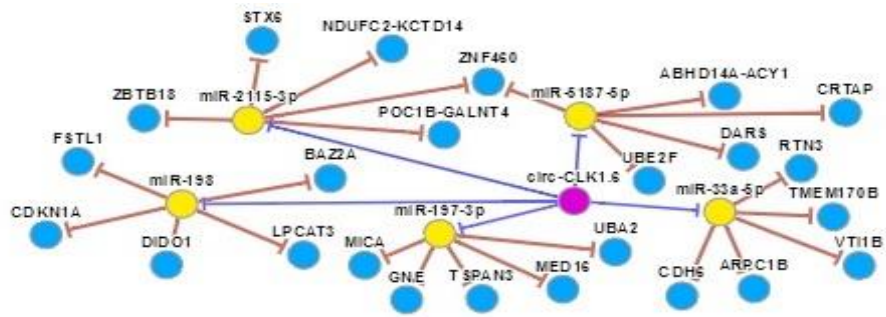

B

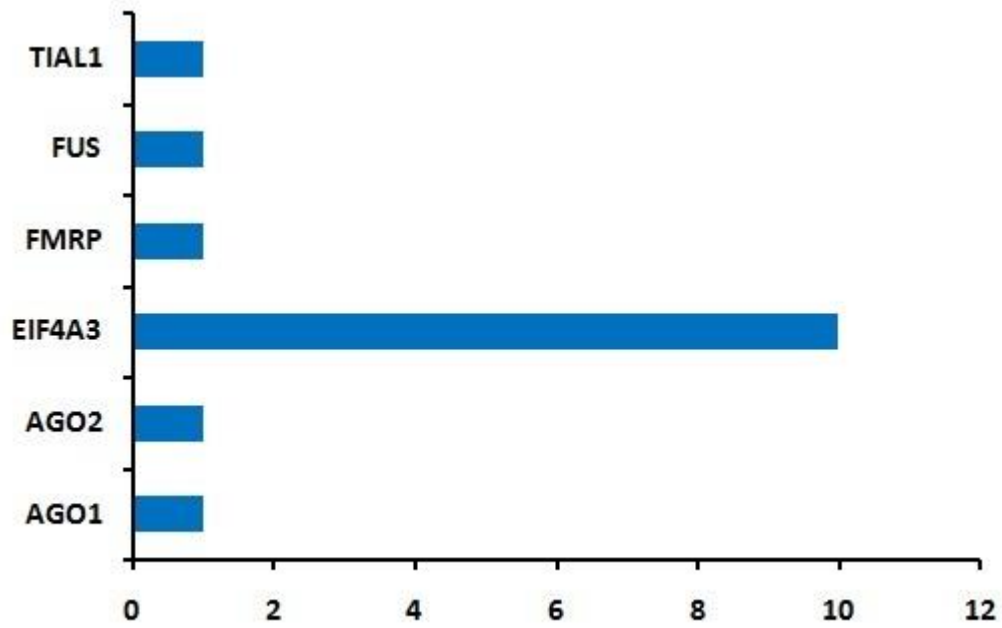

**Fig S3. Hsa\_circRNA\_102893-targeted miRNA-mRNA network prediction and annotation.** (A) The miRNA-mRNA network of hsa\_circRNA\_102893 (CLK1). (B) RNA-binding proteins and sites in the circRNA flanking regions of hsa\_circRNA\_102893.
